# Supplementary material
Source: PubMed Central journal article supplement (PMC10398545)
Supplement: jamacardiol-e232222-s001.pdf [file jamacardiol-e232222-s001.pdf]

## Supplementary Online Content

Lee SJ, Cha JJ, Choi WG, et al; RACING Investigators. Moderate-intensity statin with ezetimibe combination therapy vs high-intensity statin monotherapy in patients at very high risk of atherosclerotic cardiovascular disease: a post hoc analysis from the RACING randomized clinical trial. *JAMA Cardiol*. Published online August 2, 2023. doi:10.1001/jamacardio.2023.2222

**eTable 1.** Inclusion and Exclusion Criteria

**eTable 2.** Number of VHR Patients Meeting Each of the Definition Criteria

**eTable 3.** Baseline Characteristics of VHR and Non-VHR Patients

**eTable 4.** Serial Changes of the Lipid Profile Among VHR and Non-VHR Patients

**eTable 5.** Safety End Points in VHR and non-VHR Patients (Safety Population)

**eFigure 1.** Clinical End Points in VHR and Non-VHR Patients

**eFigure 2.** Clinical End Points According to Statin Therapy in VHR and Non-VHR Patients

**eFigure 3.** Proportion of Patients With LDL-C <70 mg/dL Among VHR and Non-VHR ASCVD

**eFigure 4.** Kaplan-Meier Curves of Discontinuation or Dose Reduction of the Study Drugs by Intolerance in VHR Patients

This supplementary material has been provided by the authors to give readers additional information about their work.

**eTable 1. Inclusion and exclusion criteria**

---

**Inclusion criteria**

1. Age 19–80 years
2. Documented atherosclerotic cardiovascular disease (meeting at least one of the following):
  - 1) Previous myocardial infarction
  - 2) Acute coronary syndrome
  - 3) Coronary revascularization (percutaneous coronary intervention or coronary artery bypass surgery) or other arterial revascularization procedures
  - 4) Ischemic stroke
  - 5) Peripheral artery disease

**Exclusion criteria**

1. Active liver disease or persistent unexplained elevated AST or ALT levels more than 2-fold the normal upper limit
2. Allergy or hypersensitivity to any statin or ezetimibe
3. Solid-organ transplantation recipient
4. History of any adverse drug reaction requiring discontinuation of statins
5. Pregnant women, potential childbearing women, or lactating women
6. Life expectancy of less than 3 years
7. Inability to follow-up the patient over a period of 1 year after enrollment, as assessed by the investigator
8. Inability to understand or read the informed consent forms

---

AST, aspartate aminotransferase; ALT, alanine aminotransferase.

**eTable 2. Number of VHR patients meeting each of the definition criteria**

| <b>Major ASCVD events</b>         |               |
|-----------------------------------|---------------|
| History of myocardial infarction  | 1,281 (84.8%) |
| History of ischemic stroke        | 194 (12.8%)   |
| Peripheral artery disease         | 110 (7.3%)    |
| Recent acute coronary syndrome    | 43 (2.8%)     |
| <b>High-Risk Conditions</b>       |               |
| Prior history of PCI or CABG      | 1,316 (87.1%) |
| Hypertension                      | 1,143 (75.6%) |
| Age $\geq$ 65 years               | 778 (51.5%)   |
| Diabetes mellitus                 | 661 (43.7%)   |
| Current smoking                   | 336 (22.2%)   |
| Chronic kidney disease*           | 212 (14.0%)   |
| Heart Failure                     | 91 (6.0%)     |
| Persistent LDL-C $\geq$ 100 mg/dL | 91 (6.0%)     |

\*Chronic kidney disease was defined as an estimated glomerular filtration rate of less than 60 ml per min per 1.73 m<sup>2</sup> of body-surface area.

Abbreviations: ASCVD, atherosclerotic cardiovascular disease; PCI, percutaneous coronary intervention; CABG, coronary artery bypass graft; LDL-C, low density lipoprotein cholesterol

**eTable 3. Baseline characteristics of VHR and non-VHR patients**

|                                             | <b>VHR<br/>(N=1,511)</b> | <b>Non-VHR<br/>(N=2,269)</b> | <b>P value</b> |
|---------------------------------------------|--------------------------|------------------------------|----------------|
| Age, years                                  | 63.9±10.1                | 63.7±9.3                     | .510           |
| Women                                       | 295 (19.5)               | 659 (29.0)                   | <.001          |
| Body mass index, kg/m <sup>2</sup>          | 25.0±3.1                 | 25.1±3.1                     | .345           |
| Prior myocardial infarction                 | 1,300 (86.0)             | 189 (8.3)                    | <.001          |
| Prior percutaneous coronary intervention    | 1,280 (84.7)             | 1,217 (53.6)                 | <.001          |
| Prior coronary bypass graft surgery         | 106 (7.0)                | 141 (6.2)                    | .363           |
| History of ischemic stroke                  | 194 (12.8)               | 19 (0.8)                     | <.001          |
| Chronic kidney disease*                     | 212 (14.0)               | 180 (7.9)                    | <.001          |
| End-stage renal disease on hemodialysis     | 23 (1.5)                 | 6 (0.3)                      | <.001          |
| Peripheral artery disease                   | 110 (7.3)                | 25 (1.1)                     | <.001          |
| Hypertension                                | 1,143 (75.6)             | 1,377 (60.7)                 | <.001          |
| Diabetes mellitus                           | 661 (43.7)               | 737 (32.5)                   | <.001          |
| Insulin treatment                           | 60 (4.0)                 | 60 (2.6)                     | .029           |
| Current smoker                              | 336 (22.2)               | 302 (13.3)                   | <.001          |
| Dyslipidemia treatment before randomization |                          |                              | <.001          |
| Drug-naive                                  | 101 (6.7)                | 215 (9.5)                    |                |
| Low-intensity statin                        | 7 (0.5)                  | 4 (0.2)                      |                |
| Moderate-intensity statin                   | 505 (33.4)               | 861 (37.9)                   |                |
| Moderate-intensity statin with ezetimibe    | 190 (12.6)               | 309 (13.6)                   |                |
| High-intensity statin                       | 640 (42.4)               | 800 (35.3)                   |                |
| High-intensity statin with ezetimibe        | 68 (4.5)                 | 80 (3.5)                     |                |
| Heart Failure                               | 91 (6.0)                 | 49 (2.2)                     |                |
| Baseline serum LDL-C, mg/dL                 | 82 (65-102)              | 78 (62-97)                   | <.001          |
| No. of patients with LDL-C < 70 mg/dL (%)   | 550 (36.4)               | 709 (31.2)                   | <.001          |

Data are mean ± SD, or number (%).

\*Chronic kidney disease was defined as an estimated glomerular filtration rate of less than 60 ml per min per 1.73 m<sup>2</sup> of body-surface area

Abbreviations: VHR, very high risk; LDL-C, low density lipoprotein cholesterol

**eTable 4. Serial changes of the lipid profile among VHR and non-VHR patients**

|                   | VHR ASCVD                           |                              |         | Non-VHR ASCVD                       |                              |         |
|-------------------|-------------------------------------|------------------------------|---------|-------------------------------------|------------------------------|---------|
|                   | Ezetimibe<br>Combination<br>Therapy | High-<br>Intensity<br>Statin | P value | Ezetimibe<br>Combination<br>Therapy | High-<br>Intensity<br>Statin | P value |
| <b>1 year</b>     | N=673                               | N=671                        |         | N=1,002                             | N=1,002                      |         |
| LDL cholesterol   | 57 (47–71)                          | 65 (53–78)                   | <.001   | 58 (47–71)                          | 68 (56–81)                   | <.001   |
| Total cholesterol | 121 (107–138)                       | 130 (115–148)                | <.001   | 124 (109–141)                       | 136 (121–154)                | <.001   |
| HDL cholesterol   | 45 (39–52)                          | 45 (39–54)                   | .690    | 47 (41–54)                          | 48 (41–55)                   | .492    |
| Triglycerides     | 109 (83–153)                        | 121 (89–169)                 | .002    | 108 (80–146)                        | 121 (91–161)                 | <.001   |
| <b>2 years</b>    | N=617                               | N=618                        |         | N=941                               | N=921                        |         |
| LDL cholesterol   | 57 (45–69)                          | 64 (51–78)                   | <.001   | 57 (46–70)                          | 66 (53–79)                   | <.001   |
| Total cholesterol | 123 (108–141)                       | 133 (117–152)                | <.001   | 125 (110–142)                       | 135 (120–154)                | <.001   |
| HDL cholesterol   | 45 (38–54)                          | 46 (38–55)                   | .393    | 47 (40–56)                          | 49 (41–57)                   | .283    |
| Triglycerides     | 114 (87–155)                        | 124 (89–170)                 | .009    | 107 (81–150)                        | 118 (88–161)                 | <.001   |
| <b>3 years</b>    | N=530                               | N=536                        |         | N=819                               | N=779                        |         |
| LDL cholesterol   | 57 (46–72)                          | 65 (51–79)                   | <.001   | 58 (47–70)                          | 67 (56–81)                   | <.001   |
| Total cholesterol | 124 (108–139)                       | 131 (117–152)                | <.001   | 125 (110–141)                       | 137 (122–153)                | <.001   |
| HDL cholesterol   | 44 (38–51)                          | 45 (38–53)                   | .235    | 46 (40–54)                          | 47 (41–55)                   | .025    |
| Triglycerides     | 114 (88–153)                        | 121 (89–165)                 | .108    | 105 (78–142)                        | 117 (87–163)                 | <.001   |

Values (mg/dL) are presented as median (interquartile range).

Abbreviations: ASCVD, atherosclerotic cardiovascular disease; LDL, low-density lipoprotein; HDL, high-density lipoprotein; VHR, very high risk

**eTable 5. Safety endpoints in VHR and non-VHR Patients (Safety Population)**

| Characteristics                                                                            | VHR (N=1,463)                                    |                                           |         | Non-VHR (N=2,219)                                  |                                             |         |                        |
|--------------------------------------------------------------------------------------------|--------------------------------------------------|-------------------------------------------|---------|----------------------------------------------------|---------------------------------------------|---------|------------------------|
|                                                                                            | Moderate-intensity statin with ezetimibe (N=732) | High-intensity statin monotherapy (N=731) | P value | Moderate-intensity statin with ezetimibe (N=1,114) | High-intensity statin monotherapy (N=1,105) | P value | <i>P<sub>int</sub></i> |
| Intolerance leading to discontinuation or dose reduction of lipid-lowering drug            | 34 (4.6)                                         | 56 (7.7)                                  | .02     | 57 (5.0)                                           | 100 (8.7)                                   | .001    | .80                    |
| Participant's subjective symptoms                                                          | 22                                               | 32                                        |         | 27                                                 | 44                                          |         |                        |
| Physicians' discretion                                                                     | 12                                               | 24                                        |         | 27                                                 | 50                                          |         |                        |
| New-onset diabetes mellitus                                                                | 57 (7.8)                                         | 75 (10.3)                                 | .12     | 88 (7.9)                                           | 84 (7.6)                                    | .87     | .16                    |
| New-onset diabetes mellitus requiring anti-diabetic medication initiation                  | 42 (5.7)                                         | 46 (6.3)                                  | .74     | 53 (4.8)                                           | 61 (5.5)                                    | .46     | .83                    |
| Muscle-related adverse events including rhabdomyolysis, myopathy, myalgia, and myonecrosis | 9 (1.2)                                          | 14 (1.9)                                  | .40     | 12 (1.1)                                           | 20 (1.8)                                    | .20     | .89                    |
| Gallbladder-related adverse events                                                         | 8 (1.1)                                          | 5 (0.7)                                   | .58     | 4 (0.4)                                            | 2 (0.2)                                     | .69     | .84                    |
| Major bleeding                                                                             | 11 (1.5)                                         | 7 (1.0)                                   | .48     | 4 (0.4)                                            | 6 (0.5)                                     | .74     | .28                    |
| Cancer diagnosis                                                                           | 20 (2.7)                                         | 10 (1.4)                                  | .10     | 17 (1.5)                                           | 16 (1.5)                                    | .99     | .21                    |
| New-onset neurocognitive disorder                                                          | 2 (0.3)                                          | 0                                         | .48     | 2 (0.2)                                            | 2 (0.2)                                     | .99     | .99                    |
| Cataract surgery                                                                           | 11 (1.5)                                         | 8 (1.1)                                   | .65     | 8 (0.7)                                            | 13 (1.2)                                    | .37     | .21                    |

Data are number (%). P values for interaction (*P<sub>int</sub>*) are between the definition of VHR ASCVD and therapy.

Abbreviations: ASCVD, atherosclerotic cardiovascular disease; VHR, very high risk

**eFigure 1. Clinical endpoints in VHR and non-VHR patients**

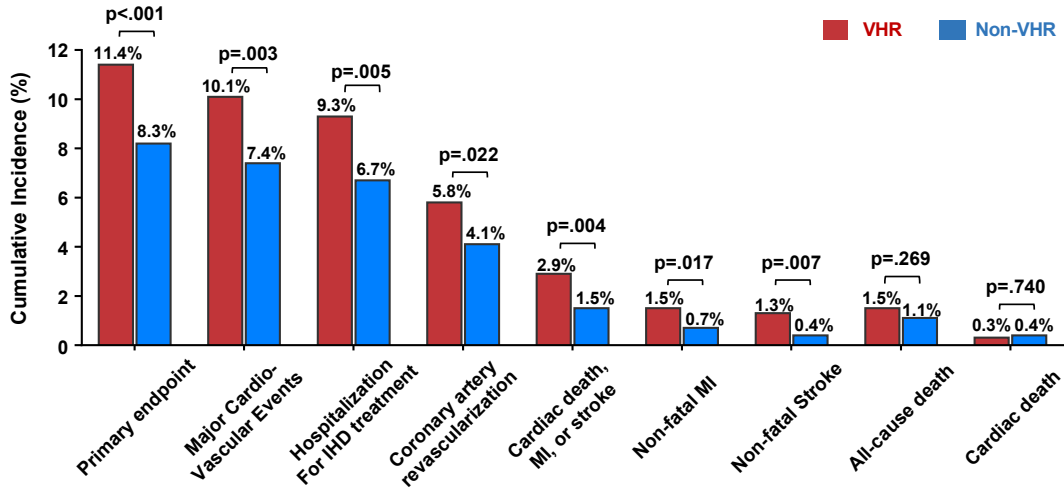

The incidence of primary and each clinical endpoint in VHR (n=1,511) and non-VHR patients (n=2,269) are presented. Major cardiovascular events were defined as coronary or peripheral revascularization or hospitalization for cardiovascular events.

Abbreviations: VHR, very high-risk; IHD, ischemic heart disease; MI, myocardial infarction.

**eFigure 2. Clinical endpoints according to statin therapy in VHR and non-VHR patients**

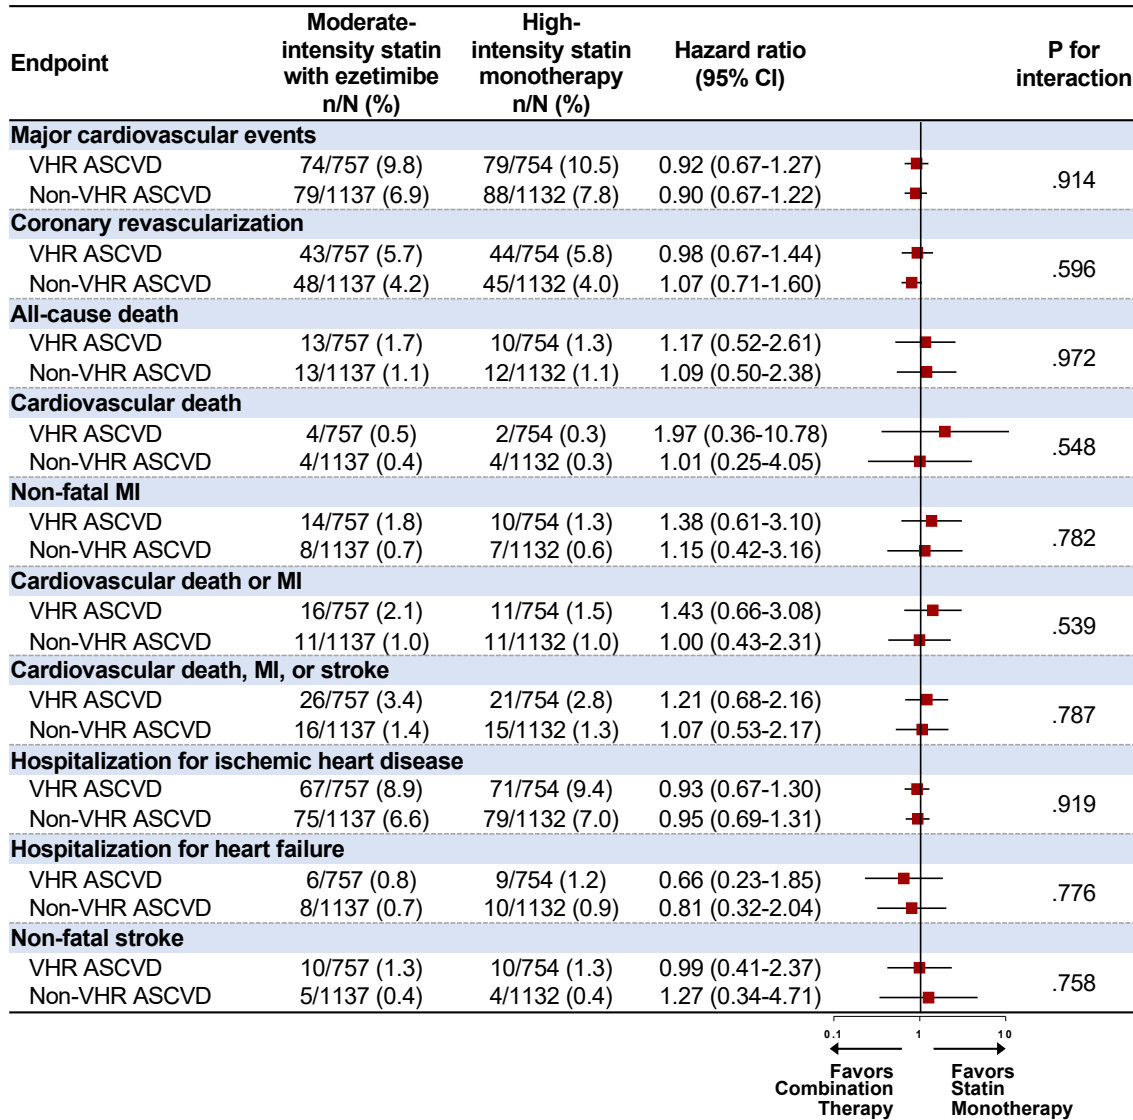

The interaction P value ( $P_{int}$ ) shows no evidence of significant heterogeneity for the treatment effects on the secondary endpoints between the VHR and non-VHR patients with ASCVD.

Abbreviations: VHR, very high-risk; ASCVD, atherosclerotic cardiovascular disease; CI, confidence interval; MI, myocardial infarction.



**eFigure 3. Proportion of patients with LDL-C <70 mg/dL among VHR and non-VHR ASCVD.**

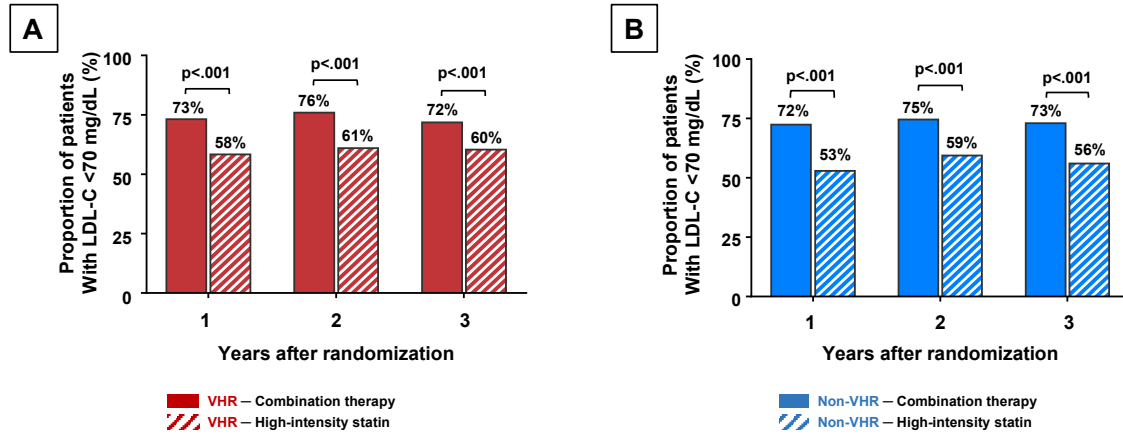

The relative proportion of patients with LDL-C <70 mg/dL at 1, 2, and 3 years after randomization among (A) VHR and (B) non-VHR ASCVD are presented.

Abbreviations: LDL-C, low-density lipoprotein cholesterol; VHR, very high risk; ASCVD, atherosclerotic cardiovascular disease

**eFigure 4. Kaplan-Meier curves of discontinuation or dose reduction of the study drugs by intolerance in VHR patients**

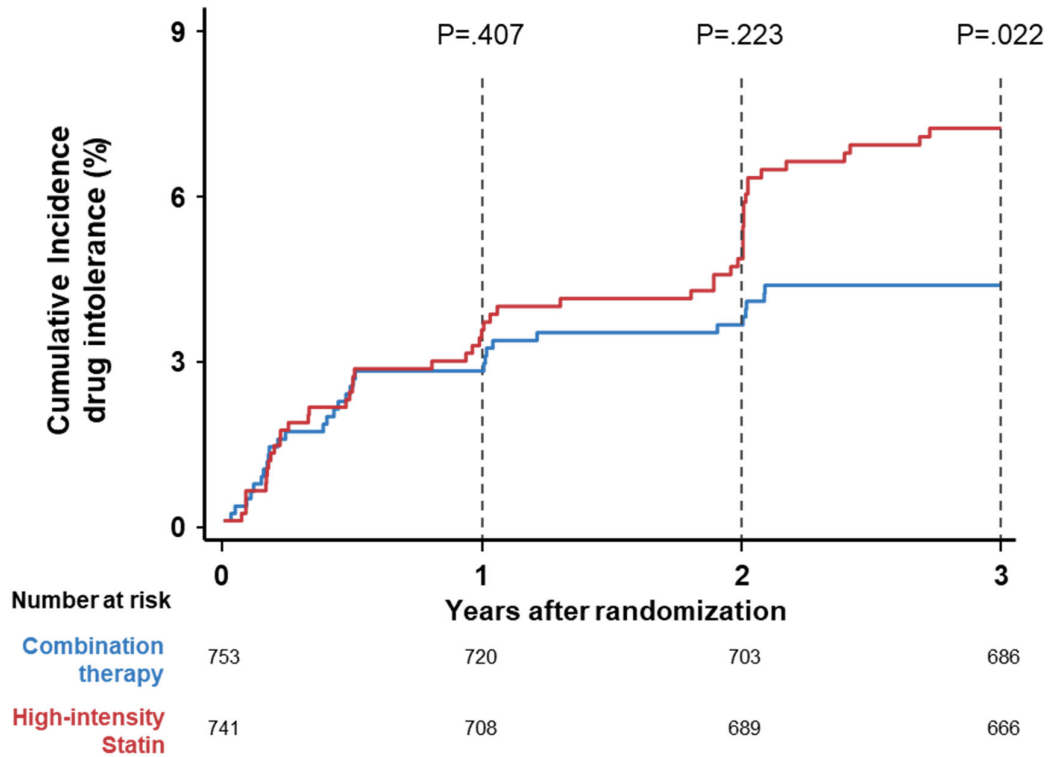

The cumulative incidence of drug intolerance leading to drug discontinuation or dose reduction in each treatment group is presented. Comparisons of the intolerance rate at 1, 2, and 3 years after randomization were conducted by chi-square test.
