# Supplementary material
Source: PubMed Central journal article supplement (PMC10398545)
Supplement: jamacardiol-e232222-s002.pdf [file jamacardiol-e232222-s002.pdf]

\*Indicates required information. Only first name, last name, and suffix will appear in PubMed.

| <b>*Group Name(s): RACING Investigators</b> |                   |                              |                         |                                                   |                                                 |                                                                |                                                                                                   |
|---------------------------------------------|-------------------|------------------------------|-------------------------|---------------------------------------------------|-------------------------------------------------|----------------------------------------------------------------|---------------------------------------------------------------------------------------------------|
| <b>*First Name and Middle Initial(s)</b>    | <b>*Last Name</b> | <b>*Suffix (eg, Jr, III)</b> | <b>Academic Degrees</b> | <b>Institution</b>                                | <b>Location (city, state/province, country)</b> | <b>Role or Contribution, eg, chair, principal investigator</b> | <b>Group (if more than 1 Group listed in the byline) and/or Subgroup (eg, Steering Committee)</b> |
| Kyeong Ho                                   | Yun               |                              | Professor, MD           | Wonkwang University Hospital                      | Iksan, Korea                                    | Enrollment of participants                                     |                                                                                                   |
| Bum-Kee                                     | Hong              |                              | Professor, MD           | Gangnam Severance Hospital                        | Seoul, Korea                                    | Enrollment of participants                                     |                                                                                                   |
| Jung Ho                                     | Heo               |                              | Professor, MD           | Kosin University Gospel Hospital                  | Busan, Korea                                    | Enrollment of participants                                     |                                                                                                   |
| Won Young                                   | Jang              |                              | Professor, MD           | Korea University, Kuro Hospital                   | Seoul, Korea                                    | Enrollment of participants                                     |                                                                                                   |
| Won-Yong                                    | Shin              |                              | Professor, MD           | Soonchunhyang University Cheonan Hospital         | Cheonan, Korea                                  | Enrollment of participants                                     |                                                                                                   |
| Sang Wook                                   | Im                |                              | Professor, MD           | CHA University Hospital                           | Seongnam, Korea                                 | Enrollment of participants                                     |                                                                                                   |
| Woong Chol                                  | Kang              |                              | Professor, MD           | Gachon University Gil Hospital                    | Incheon, Korea                                  | Enrollment of participants                                     |                                                                                                   |
| Young Hoon                                  | Jung              |                              | Professor, MD           | Gyeongsang University Hospital                    | Changwon, Korea                                 | Enrollment of participants                                     |                                                                                                   |
| Yongwhi                                     | Park              |                              | Professor, MD           | Gyeongsang University Hospital                    | Changwon, Korea                                 | Enrollment of participants                                     |                                                                                                   |
| Sung Yoon                                   | Lee               |                              | Professor, MD           | Inje University Paik Hospital                     | Ilsan, Korea                                    | Enrollment of participants                                     |                                                                                                   |
| Seung Ho                                    | Hur               |                              | Professor, MD           | Keimyung Univeristy Dongsan Hospital              | Daegu, Korea                                    | Enrollment of participants                                     |                                                                                                   |
| Hyun Hee                                    | Choi              |                              | Professor, MD           | Chuncheon Sungsim Hospital                        | Chuncheon, Korea                                | Enrollment of participants                                     |                                                                                                   |
| Kyoung Jin                                  | Kim               |                              | Professor, MD           | Ehwa University Womans hospital                   | Seoul, Korea                                    | Enrollment of participants                                     |                                                                                                   |
| Ju Han                                      | Kim               |                              | Professor, MD           | Cheonnam National University Hospital             | Gwangju, Korea                                  | Enrollment of participants                                     |                                                                                                   |
| Hyun Kuk                                    | Kim               |                              | Professor, MD           | Chosun University Hospital                        | Gwangju, Korea                                  | Enrollment of participants                                     |                                                                                                   |
| Jung Hee                                    | Lee               |                              | Professor, MD           | Yeoungnam University Hospital                     | Daegu, Korea                                    | Enrollment of participants                                     |                                                                                                   |
| Ung                                         | Kim               |                              | Professor, MD           | Yeoungnam University Hospital                     | Daegu, Korea                                    | Enrollment of participants                                     |                                                                                                   |
| Jung Ho                                     | Heo               |                              | Professor, MD           | Kosin University Gospel Hospital                  | Busan, Korea                                    | Enrollment of participants                                     |                                                                                                   |
| Yu-Jung                                     | Choi              |                              | Professor, MD           | Eulji University Daejon Hospital                  | Daejon, Korea                                   | Enrollment of participants                                     |                                                                                                   |
| Seung-Woon                                  | Rha               |                              | Professor, MD           | Korea University, Kuro Hospital                   | Seoul, Korea                                    | Enrollment of participants                                     |                                                                                                   |
| Yun-Hyeong                                  | Cho               |                              | Professor, MD           | Myongji Hospital, Hanyang University College of M | Goyang, Korea                                   | Enrollment of participants                                     |                                                                                                   |
