# Supplementary material
Source: PubMed Central journal article supplement (PMC10398545)
Supplement: jamacardiol-e232222-s003.pdf [file jamacardiol-e232222-s003.pdf]

## Data Sharing Statement

Lee. Moderate-Intensity Statin With Ezetimibe Combination Therapy vs High-Intensity Statin Monotherapy in Patients at Very High Risk of Atherosclerotic Cardiovascular Disease. *JAMA Cardiol.* Published August 02, 2023. doi:10.1001/jamacardio.2023.2222

### Data

**Data available:** No

### Additional Information

**Explanation for why data not available:** Sharing of the data would not be available since the consent was not obtained for data sharing
